# Supplementary material
Source: Springer Nature journal article supplement (https://www.springermedizin.de/resource/supplementary/12974_2004_23_MOESM5_ESM.pdf/9600016)

## oxLDL Binding

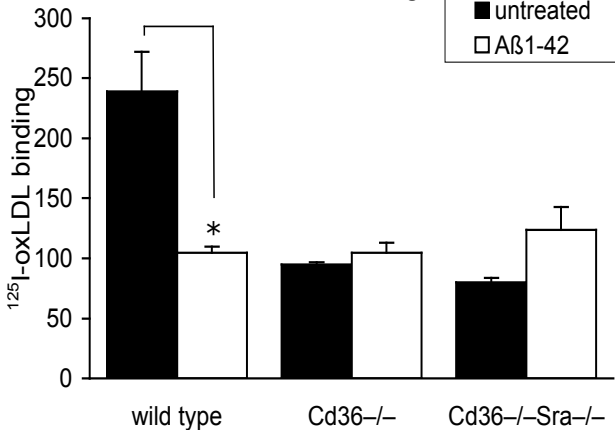

Supplement: MOESM5 [file 9600016]
